# Supplementary material
Source: publisher figshare collection journal article supplement (https://gsajournals.figshare.com/ndownloader/files/26754098)
Supplement: Supplementary file 1 [file 26754098]

## Sheet: Sheet1
Table S4 Sources of variance explained by each components in Equation 2 and repeatability for SNP1 (tob) and SNP2 (bottom).
Variance component (Random effect)	Percentage of variation explained by each variable component for each type of height measurement by ruler
	TH	FH	EH
Population	71.2	65.8	80.9***
SNP1	1	0.6	0.1***
Population*SNP1	1.8	0.8	0.1***
Row	1.4	2.1	0.7***
Range	5.4***	7.0***	2.9***
Replication	7.2	8	2.8
Residual	11.9	15.7	12.4
Total variation in number	482.4	363.4	343.1
Repeatability (R)	0.92	0.89	0.93
Variance component (Random effect)	Percentage of variation explained by each variable component for each type of height measurement by ruler
	TH	FH	EH
Population	65.1***	77.5	69.8
SNP2	0.4***	0.3***	0.1***
Population*SNP2	0.1***	0.1***	0.8
Row	0.3***	0.4***	0.3
Range	9.7***	7.1***	5.7**
Replication	11.9	6.7	7
Residual	12.5	7.8	16.1
Total variation in number	594.2	720.5	244.4
Repeatability (R)	0.91	0.95	0.9
*, **, *** are the significance level of 0.05, 0.01 and 0.001 respectively.
